# Supplementary material for: A Systems Biology Approach to Understanding the Mechanisms of Action of an Alternative Anticancer Compound in Comparison to Cisplatin
Source: PubMed Central journal article supplement (PMC5302693; doi:10.3390/proteomes2040501), 2014-11-10
Supplement: proteomes-02-00501-s001.pdf [file proteomes-02-00501-s001.pdf]

## Supplementary Material

**Table S1.** Gene deletions that resulted in a 1.5-fold maximum decreases in abundance of fluorescently labelled TAG sequences. 133 deletion mutants had significantly different mean fluorescent signal in 56MESS exposed cultures relative to control ( $p < 0.05$ ).

| ORF       | Gene     | Fold-Change | <i>p</i> -value |
|-----------|----------|-------------|-----------------|
| YAL020C   | ATS1     | 0.07        | 1.87E-03        |
| YAL040C   | CLN3     | 0.19        | 5.37E-02        |
| YAL043C-A | KRE23    | 0.36        | 8.81E-02        |
| YAL047C   | SPC72    | 0.63        | 3.25E-02        |
| YAL056W   | GPE2     | 0.26        | 2.64E-02        |
| YBL022C   | PIM1     | 0.09        | 4.96E-02        |
| YBL031W   | SHE1     | 0.14        | 3.10E-02        |
| YBL038W   | MRPL16   | 0.06        | 5.74E-02        |
| YBL079W   | NUP170   | 0.19        | 5.89E-02        |
| YBL099W   | ATP1     | 0.27        | 2.12E-02        |
| YBR189W   | RPS9B    | 0.57        | 9.02E-03        |
| YBR208C   | "DUR1,2" | 0.29        | 4.37E-02        |
| YBR251W   | MRPS5    | 0.55        | 5.14E-02        |
| YBR268W   | MRPL37   | 0.42        | 5.17E-02        |
| YBR286W   | APE3     | 0.31        | 1.11E-02        |
| YBR291C   | CTP1     | 0.08        | 6.47E-02        |
| YCR027C   | RSG1     | 0.09        | 4.77E-02        |
| YCR028C   | FEN2     | 0.49        | 3.85E-02        |
| YCR053W   | THR4     | 0.15        | 4.35E-02        |
| YCR068W   | CVT17    | 0.11        | 4.21E-02        |
| YDL048C   | STP4     | 0.16        | 3.98E-02        |
| YDR075W   | PPH3     | 0.22        | 2.22E-02        |
| YDR080W   | VPS41    | 0.14        | 1.08E-03        |
| YDR140W   | FYV9     | 0.31        | 6.24E-02        |
| YDR147W   | EKI1     | 0.58        | 1.64E-03        |
| YDR175C   | RSM24    | 0.54        | 9.94E-02        |
| YDR225W   | HTA1     | 0.51        | 7.14E-03        |
| YDR226W   | ADK1     | 0.41        | 1.09E-02        |
| YDR227W   | SIR4     | 0.56        | 3.43E-03        |
| YDR234W   | LYS4     | 0.42        | 4.29E-03        |
| YDR245W   | MNN10    | 0.41        | 3.18E-04        |
| YDR253C   | MET32    | 0.34        | 7.02E-02        |
| YDR264C   | AKR1     | 0.43        | 1.54E-03        |
| YDR265W   | PEX10    | 0.26        | 2.90E-02        |
| YDR276C   | PMP3     | 0.21        | 1.78E-02        |
| YDR281C   | PHM6     | 0.23        | 2.65E-02        |
| YDR296W   | MHR1     | 0.58        | 7.87E-05        |
| YDR298C   | ATP5     | 0.52        | 1.67E-03        |

Table S1. Cont.

| ORF     | Gene   | Fold-Change | p-value  |
|---------|--------|-------------|----------|
| YDR300C | PRO1   | 0.38        | 1.13E-03 |
| YDR335W | MSN5   | 0.23        | 9.76E-03 |
| YDR385W | EFT2   | 0.11        | 2.46E-02 |
| YDR389W | SAC7   | 0.10        | 7.49E-02 |
| YEL053C | MAK10  | 0.57        | 4.74E-04 |
| YER048C | CAJ1   | 0.48        | 1.53E-03 |
| YER072W | VTC1   | 0.16        | 1.33E-04 |
| YER116C | SLX8   | 0.62        | 2.12E-02 |
| YFR040W | SAP155 | 0.26        | 4.72E-03 |
| YGL035C | MIG1   | 0.50        | 6.64E-02 |
| YGL148W | ARO2   | 0.16        | 6.88E-02 |
| YGL153W | PEX14  | 0.42        | 1.25E-02 |
| YGL212W | VAM7   | 0.05        | 5.85E-02 |
| YGR007W | MUQ1   | 0.27        | 7.62E-02 |
| YGR056W | RSC1   | 0.52        | 6.95E-02 |
| YGR077C | PEX8   | 0.29        | 1.44E-02 |
| YGR092W | DBF2   | 0.46        | 3.34E-02 |
| YGR133W | PEX4   | 0.52        | 2.33E-02 |
| YGR155W | CYS4   | 0.50        | 3.19E-02 |
| YGR166W | KRE11  | 0.42        | 1.90E-02 |
| YGR170W | PSD2   | 0.24        | 1.53E-03 |
| YGR180C | RNR4   | 0.39        | 6.12E-03 |
| YHL007C | STE20  | 0.22        | 6.06E-02 |
| YHR039C | MSC7   | 0.54        | 6.81E-03 |
| YHR103W | SBE22  | 0.48        | 2.38E-03 |
| YHR104W | GRE3   | 0.27        | 1.75E-02 |
| YHR108W | GGA2   | 0.26        | 4.43E-04 |
| YHR129C | ARP1   | 0.35        | 4.05E-02 |
| YHR204W | HTM1   | 0.58        | 2.82E-02 |
| YIL030C | SSM4   | 0.59        | 2.95E-02 |
| YIL033C | BCY1   | 0.35        | 4.97E-05 |
| YIL052C | RPL34B | 0.04        | 5.52E-03 |
| YIL154C | IMP2'  | 0.01        | 6.65E-02 |
| YJL024C | APS3   | 0.56        | 5.79E-02 |
| YJL062W | LAS21  | 0.04        | 8.90E-02 |
| YJL073W | JEM1   | 0.32        | 9.12E-03 |
| YJL080C | SCP160 | 0.41        | 1.24E-02 |
| YJL094C | KHA1   | 0.62        | 9.49E-02 |
| YJL095W | BCK1   | 0.05        | 2.33E-02 |
| YJL101C | GSH1   | 0.13        | 8.55E-02 |
| YJL129C | TRK1   | 0.31        | 7.31E-03 |
| YJL140W | RPB4   | 0.25        | 6.63E-02 |

Table S1. Cont.

| ORF       | Gene   | Fold-Change | p-value  |
|-----------|--------|-------------|----------|
| YJL165C   | HAL5   | 0.05        | 6.86E-04 |
| YJR040W   | GEF1   | 0.50        | 3.12E-03 |
| YJR117W   | STE24  | 0.31        | 3.54E-02 |
| YKL209C   | STE6   | 0.53        | 2.80E-03 |
| YKR006C   | MRPL13 | 0.27        | 3.84E-02 |
| YKR019C   | IRS4   | 0.39        | 9.34E-02 |
| YKR048C   | NAP1   | 0.29        | 3.40E-02 |
| YLL043W   | FPS1   | 0.08        | 3.99E-03 |
| YLR025W   | SNF7   | 0.21        | 8.72E-02 |
| YLR110C   | CCW12  | 0.29        | 1.31E-02 |
| YLR191W   | PEX13  | 0.32        | 1.19E-02 |
| YLR216C   | CPR6   | 0.39        | 3.76E-02 |
| YLR332W   | MID2   | 0.19        | 1.52E-03 |
| YLR360W   | VPS38  | 0.26        | 3.71E-02 |
| YLR393W   | ATP10  | 0.10        | 7.41E-02 |
| YLR443W   | ECM7   | 0.52        | 1.95E-02 |
| YML021C   | UNG1   | 0.42        | 1.36E-02 |
| YML067C   | ERV41  | 0.35        | 2.56E-03 |
| YML081C-A | ATP18  | 0.20        | 5.70E-02 |
| YML106W   | URA5   | 0.52        | 9.38E-02 |
| YMR015C   | ERG5   | 0.30        | 2.45E-02 |
| YMR032W   | HOF1   | 0.38        | 8.99E-02 |
| YMR038C   | LYS7   | 0.28        | 8.04E-02 |
| YMR039C   | SUB1   | 0.33        | 8.57E-03 |
| YMR070W   | MOT3   | 0.26        | 3.12E-02 |
| YMR214W   | SCJ1   | 0.08        | 1.69E-02 |
| YNL054W   | VAC7   | 0.003       | 3.26E-02 |
| YNL183C   | NPR1   | 0.08        | 2.47E-06 |
| YNL197C   | WHI3   | 0.10        | 2.47E-02 |
| YNL214W   | PEX17  | 0.45        | 1.19E-02 |
| YNL257C   | SIP3   | 0.35        | 2.19E-02 |
| YNL283C   | WSC2   | 0.24        | 8.69E-02 |
| YNL288W   | CAF40  | 0.59        | 1.91E-02 |
| YNL291C   | MID1   | 0.55        | 4.05E-02 |
| YNL322C   | KRE1   | 0.34        | 1.53E-02 |
| YNL325C   | FIG4   | 0.57        | 6.87E-02 |
| YNR006W   | VPS27  | 0.28        | 1.92E-03 |
| YOL115W   | TRF4   | 0.48        | 6.50E-02 |
| YOR035C   | SHE4   | 0.23        | 7.50E-02 |
| YOR089C   | VPS21  | 0.30        | 1.08E-02 |
| YOR125C   | CAT5   | 0.40        | 4.99E-02 |
| YOR133W   | EFT1   | 0.46        | 1.91E-03 |

Table S1. Cont.

| ORF     | Gene  | Fold-Change | p-value  |
|---------|-------|-------------|----------|
| YOR216C | RUD3  | 0.02        | 4.04E-02 |
| YOR297C | TIM18 | 0.15        | 1.35E-03 |
| YOR360C | PDE2  | 0.54        | 4.18E-02 |
| YOR371C | GPE1  | 0.42        | 4.94E-02 |
| YPL002C | SNF8  | 0.40        | 8.80E-02 |
| YPL078C | ATP4  | 0.50        | 8.04E-02 |
| YPL120W | VPS30 | 0.05        | 2.89E-03 |
| YPL161C | BEM4  | 0.23        | 3.11E-02 |
| YPL178W | CBC2  | 0.30        | 3.75E-02 |
| YPL226W | NEW1  | 0.20        | 3.63E-02 |
| YPR164W | KIM3  | 0.53        | 1.68E-02 |

Figure S1. Distribution of gene function among 133 deletion mutants indicated as sensitive to 56MESS by microarray signal fold change (*i.e.*,  $\geq 1.5$ -fold). Trafficking, protein handling, protein degradation and translation constitute a significant proportion of the functions identified using the deletion mutants.

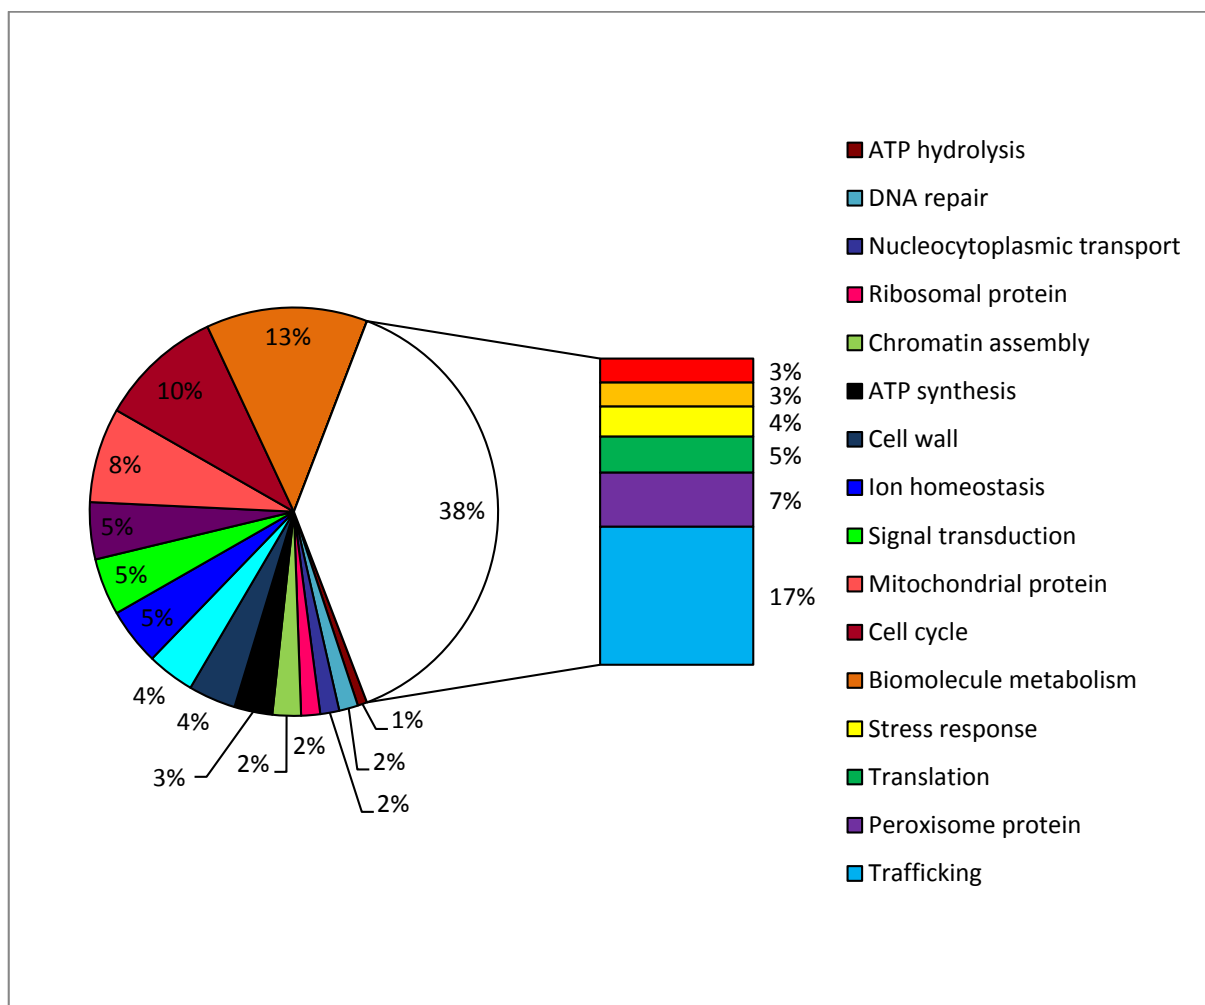

**Figure S2.** Kill curve using wildtype BY4743 yeast to determine comparable concentrations for 56MESS and cisplatin over a 2–8 h period. ◆ Solvent; ■ 1.5 mM 56MESS; ▲ 2 mM 56MESS; ▼ 1.0 mM cisplatin; ◆ 1.5 mM Cisplatin; ⊕ 2 mM cisplatin. Concentrations of cisplatin greater than 1.0 mM resulted in rapid cell death.

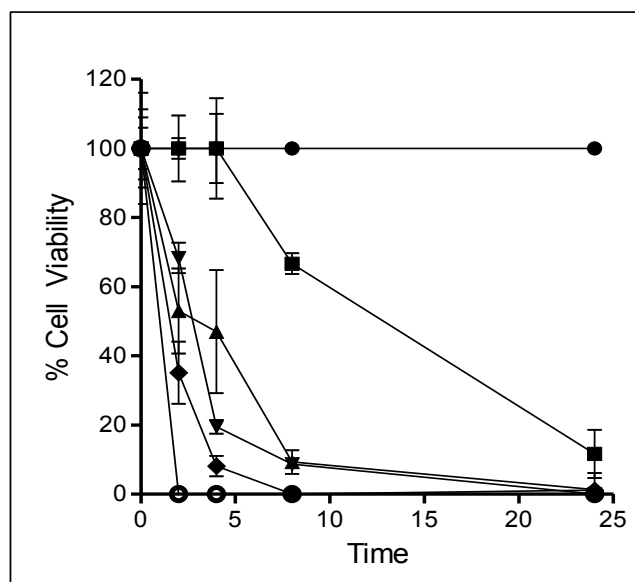

**Table S2.** Calculated theoretical molecular weights and isoelectric points of protein spots that show increased abundance following compound exposure. These spots undergo a minimum 2-fold change in fluorescent volume

| Spot number                                    | Isoelectric Point | Molecular Weight (kDa) | Fold Change |
|------------------------------------------------|-------------------|------------------------|-------------|
| More abundant in cisplatin relative to Control |                   |                        |             |
| 1                                              | 4.9               | 17.3                   | 2.0         |
| 2                                              | 4.7               | 17.2                   | 2.2         |
| 3                                              | 4.7               | 13.3                   | 2.3         |
| 4                                              | 4.9               | 27.2                   | 2.4         |
| 5                                              | 4.5               | 13.3                   | 2.6         |
| 6                                              | 6.1               | 36.1                   | 3.4         |
| 7                                              | 4.6               | 21.7                   | 9.9         |
| 8                                              | 4.5               | 23.3                   | 11.5        |
| More abundant in 56MESS relative to Control    |                   |                        |             |
| 9                                              | 4.7               | 39.5                   | 3.8         |
| 10                                             | 4.6               | 24.2                   | 4.8         |
| 11                                             | 4.7               | 75.0                   | 5.0         |
| 12                                             | 4.6               | 46.2                   | 8.9         |
| 13                                             | 4.6               | 63.1                   | 12.7        |
| 14                                             | 4.7               | 41.9                   | 15.0        |
| 15                                             | 4.5               | 27.0                   | 16.3        |
| 16                                             | 4.5               | 37.6                   | 31.8        |

**Table S3.** Calculated theoretical molecular weights and isoelectric points of protein spots that show decreased abundance following compound exposure. These spots undergo a minimum 2-fold change in fluorescent volume.

| <b>Spot number</b>                             | <b>Isoelectric Point</b> | <b>Molecular Weight (kDa)</b> | <b>Fold Change</b> |
|------------------------------------------------|--------------------------|-------------------------------|--------------------|
| More abundant in control relative to cisplatin |                          |                               |                    |
| 17                                             | 5.4                      | 13.7                          | 2.3                |
| 18                                             | 7.4                      | 72.8                          | 2.4                |
| 19                                             | 5.4                      | 13.7                          | 2.5                |
| 20                                             | 5.4                      | 13.5                          | 2.8                |
| 21                                             | 4.7                      | 18.7                          | 2.8                |
| 22                                             | 4.8                      | 20.1                          | 2.9                |
| More abundant in control relative to 56MESS    |                          |                               |                    |
| 23                                             | 5.1                      | 44.6                          | 2.2                |
| 24                                             | 4.9                      | 39.5                          | 2.3                |
| 25                                             | 4.8                      | 28.6                          | 2.3                |
| 26                                             | 5.0                      | 24.5                          | 2.3                |
| 27                                             | 6.0                      | 18.6                          | 2.4                |
| 28                                             | 5.0                      | 61.7                          | 2.5                |
| 29                                             | 6.1                      | 22.4                          | 2.5                |
| 30                                             | 4.9                      | 59.6                          | 3.3                |
| 31                                             | 5.2                      | 64.7                          | 3.4                |
| 32                                             | 4.9                      | 32.9                          | 3.9                |
| 33                                             | 5.3                      | 55.8                          | 4.1                |
| 34                                             | 8.8                      | 31.1                          | 4.1                |
| 35                                             | 4.8                      | 29.6                          | 4.4                |
| 36                                             | 5.1                      | 88.0                          | 4.7                |
| 37                                             | 5.3                      | 60.2                          | 6.4                |
| 38                                             | 5.9                      | 65.5                          | 9.9                |

**Table S4.** Gene name and function summary from SGD of the 48 deletion mutants that were identified by microarray and confirmed by individual growth analysis. \* indicate proteins that have molecular weight and pI characteristics that are comparable to a protein indicated in Tables S2 or S3.

| ORF       | Gene   | Description (SGD)                                                            | Molecular Weight | Isoelectric Point |   |
|-----------|--------|------------------------------------------------------------------------------|------------------|-------------------|---|
| YCR053W   | THR4   | Threonine synthase                                                           | 57.5             | 5.4               | * |
| YDR140W   | MTQ2   | S-adenosylmethionine-dependent methyltransferase                             | 25.0             | 4.8               | * |
| YMR070W   | MOT3   | Zinc finger transcription factor                                             | 54.4             | 9.2               |   |
| YIL154C   | IMP2'  | Ion homeostasis transcription factor                                         | 39.1             | 4.8               | * |
| YMR015C   | ERG5   | Cytochrome P450 enzyme—sterol desaturase                                     | 61.3             | 7.9               |   |
| YML081C-A | ATP18  | Subunit of mitochondrial F <sub>1</sub> F <sub>0</sub> ATP synthase          | 6.7              | 10.5              |   |
| YDR226W   | ADK1   | Adenylate kinase for purine metabolism                                       | 24.3             | 6.4               | * |
| YNL197C   | WHI3   | RNA binding protein that regulates cell fate                                 | 71.3             | 8.5               |   |
| YJL080C   | SCP160 | RNA-binding G protein effector of mating response                            | 134.8            | 5.7               |   |
| YFR040W   | SAP155 | Required for Sit4p protein phosphatase complex                               | 115.0            | 4.3               |   |
| YDR389W   | SAC7   | GTPase activating protein                                                    | 73.6             | 10.4              |   |
| YMR032W   | HOF1   | SH3 domain-containing protein required for cytokinesis                       | 76.2             | 9.9               |   |
| YGR092W   | DBF2   | Ser/Thr kinase involved in transcription and stress response                 | 66.1             | 9.3               |   |
| YPL161C   | BEM4   | Protein involved in establishing cell polarity and buds                      | 71.0             | 4.8               | * |
| YAL020C   | ATS1   | Modifier of wobble nucleosides in tRNA, role in cell cycle                   | 36.5             | 6.7               | * |
| YNL322C   | KRE1   | Cell wall glycoprotein                                                       | 32.2             | 9.2               | * |
| YLR110C   | CCW12  | Cell wall mannoprotein                                                       | 13.1             | 4.4               | * |
| YBL022C   | PIM1   | ATP-dependent Lon protease                                                   | 127.1            | 5.4               |   |
| YNL291C   | MID1   | N-glycosylated integral membrane protein, cation channel                     | 61.8             | 4.2               | * |
| YJR040W   | GEF1   | Voltage-gated chloride channel, Golgi                                        | 87.6             | 7.1               |   |
| YLR393W   | ATP10  | Assembly factor for mitochondrial F <sub>1</sub> F <sub>0</sub> ATP synthase | 32.1             | 10.4              | * |
| YPL226W   | NEW1   | ATP binding cassette protein                                                 | 134.3            | 5.7               |   |
| YBR291C   | CTP1   | Mitochondrial protein citrate transporter                                    | 32.2             | 10.4              | * |
| YKR048C   | NAP1   | Histone chaperone                                                            | 47.9             | 4.1               | * |
| YDR335W   | MSN5   | Karyopherin involved in nuclear import and export                            | 142.1            | 5.1               |   |
| YER048C   | CAJ1   | Nuclear type II J heat shock protein                                         | 44.9             | 5.6               | * |
| YJL129C   | TRK1   | Component of a potassium transport system                                    | 141.1            | 8.9               |   |
| YJR117W   | STE24  | Zinc metalloprotease                                                         | 52.3             | 8.0               |   |
| YDR276C   | PMP3   | Small plasma membrane protein                                                | 6.1              | 4.0               |   |
| YJL165C   | HAL5   | Protein kinase                                                               | 95.5             | 8.4               |   |
| YAL056W   | GPB2   | Multi-step regulator of cAMP-PKA signalling                                  | 98.7             | 7.2               |   |
| YJL095W   | BCK1   | MAPKKK in the protein kinase C signalling pathway                            | 164.2            | 10.3              |   |
| YER072W   | VTC1   | Subunit of the vacuolar transporter complex                                  | 14.4             | 11.3              |   |
| YDR080W   | VPS41  | Vacuolar membrane protein, subunit of the HOPS complex                       | 113.4            | 4.6               |   |
| YPL120W   | VPS30  | Subunit of phosphatidylinositol 3-kinase complexes I and II                  | 63.3             | 4.8               | * |
| YNR006W   | VPS27  | Endosomal protein required for recycling Golgi proteins                      | 71.0             | 5.1               |   |
| YGL212W   | VAM7   | Vacuolar SNARE protein, trafficking                                          | 36.7             | 9.0               |   |
| YPL002C   | SNF8   | Component of the ESCRT-II complex                                            | 27.0             | 5.5               | * |

**Table S4. Cont.**

| <b>ORF</b> | <b>Gene</b> | <b>Description (SGD)</b>                                             | <b>Molecular Weight</b> | <b>Isoelectric Point</b> |   |
|------------|-------------|----------------------------------------------------------------------|-------------------------|--------------------------|---|
| YOR216C    | RUD3        | Golgi matrix protein                                                 | 56.1                    | 4.7                      | * |
| YGR170W    | PSD2        | Phosphatidylserine decarboxylase of the Golgi and vacuolar membranes | 130.1                   | 7.9                      |   |
| YDR245W    | MNN10       | Golgi mannosyltransferase complex protein                            | 46.7                    | 6.9                      |   |
| YAL043C-A  |             | Unknown, overlaps ERV46 (membrane fusion)                            | 13.7                    | 9.6                      |   |
| YML067C    | ERV41       | Protein localised to COPII-coated vesicles                           | 40.7                    | 4.6                      | * |
| YCR068W    | ATG15       | Vacuolar lipase for intra-vacuolar lysis                             | 58.4                    | 5.3                      | * |
| YAL040C    | CLN3        | G1 cyclin involved in cell cycle progression                         | 65.0                    | 9.8                      |   |
| YBR286W    | APE3        | Vacuolar aminopeptidase Y                                            | 60.1                    | 5.0                      | * |
| YDR264C    | AKR1        | Palmitoyl transferase involved in protein palmitoylation             | 85.8                    | 5.5                      | * |
| YNL183C    | NPR1        | Protein kinase                                                       | 86.0                    | 8.4                      |   |
